# Supplementary material for: Novel tetraphenylethylene (TPE)-functionalized nitroxide/alkoxyamine for nitroxide-mediated homogeneous and heterogeneous polymerizations
Source: Royal Society of Chemistry journal article supplement (doi:10.1039/d0py01369b), 2020-12-15
Supplement: d0py01369b1.pdf [file d0py01369b1.pdf]

***Supporting Information:***

**Novel tetraphenylethylene (TPE) functionalized  
nitroxide/alkoxyamine for nitroxide mediated homogeneous and  
heterogeneous polymerization**

Huanhuan Ma,<sup>§</sup> Linan Wang,<sup>§</sup> Yachao Liang, Zhe Cui, Peng Fu, Minying Liu,  
Xiaoguang Qiao\* and Xinchang Pang\*

Henan Joint International Research Laboratory of Living Polymerizations and  
Functional Nanomaterials, Henan Key Laboratory of Advanced Nylon Materials and  
Application, School of Materials Science and Engineering, Zhengzhou University,  
Zhengzhou, 450001, China.

\*To whom correspondence should be addressed. <sup>§</sup>These authors contributed equally to  
this work.

Corresponding Author:

[joexiaoguang@hotmail.com](mailto:joexiaoguang@hotmail.com)

[Pangxinchang1980@163.com](mailto:Pangxinchang1980@163.com)

### *Synthesis of Dispolreg 007-TPE*

The preparation process of Dispolreg 007-TPE was shown in Fig S2.

Step 1: 4 g TPE-Br was dissolved in 100 mL CH<sub>2</sub>Cl<sub>2</sub> in a 250mL round-bottomed flask and the solution was cooled in an ice bath. To the stirred solution was added drop wise 3.8 mL cyclohexylamine in ca. 1 h and the resulting mixture was stirred overnight at room temperature. 0.5 mL triethylamine was added to the reaction system and continued reaction for 6 h. The reaction mixture was washed by 150mL 1 M hydrochloric acid solution for 3 times. The organic layers were collected and CH<sub>2</sub>Cl<sub>2</sub> was removed by rotary evaporation. This gave 4.3 g (96 %) of product 1 as a light-yellow solid that was sufficiently pure for the next step. <sup>1</sup>H NMR δ 2.39 (a, 1 H), 3.58-3.71 (b, 2 H), 1.05-1.99 (c, 10 H), 6.86-7.22 (d, 19H).

Step 2: according to the general recipe described in the first example using the product of Step 1 and 3.71 g of sodium bicarbonate in 250 mL each of THF and water, then adding portion wise 6.55 g of Oxone® in aqueous solution gave crude product. THF was removed by rotary evaporation, and then the rotary evaporated product was extracted with CH<sub>2</sub>Cl<sub>2</sub>, the product is obtained by rotary distillation of the extract. Total yield: 3 g (70 %) of product 2. <sup>1</sup>H NMR δ 3.63 (a, 1 H), 6.84-7.28 (b, f, 20 H), 0.71-1.86 (c, 10 H).

Step 3: 3 g product 2 and 1.776 g (1.65 equiv.) of AIBN in 250 mL of toluene were stirred at 92 °C (bath temp) for 6 h. Evaporation of the solvent, re-dissolving the product in hot isopropanol and slowly cooling to room temperature, afforded the crop. Total yield: 1.5 g (45 %) of Dispolreg 007-TPE. <sup>1</sup>H NMR δ 3.71 (a, 1 H), 4.72 (b, 1 H), 1.20-

2.03 (c, d, e, 22 H), 6.95-7.45 (f, 19 H).

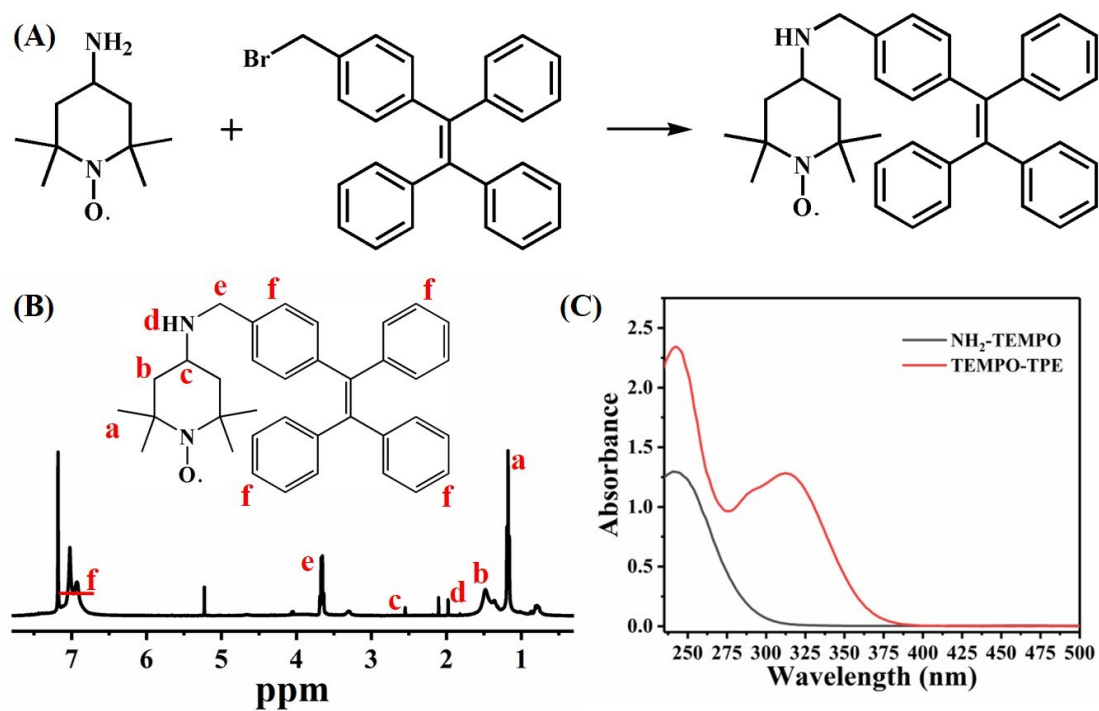

**Fig. S1.** (A) Preparation process of TEMPO-TPE nitroxide (B) <sup>1</sup>H NMR spectra of TEMPO-TPE nitroxide (C) UV-vis spectra of NH<sub>2</sub>-TEMPO and TEMPO-TPE nitroxide.

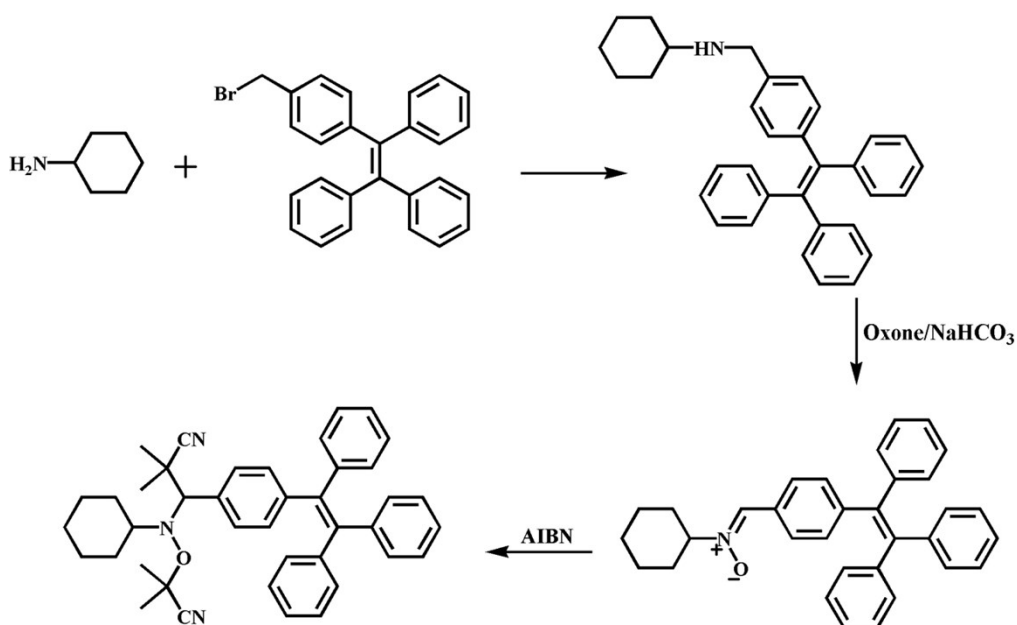

**Fig. S2.** Preparation process of Dispolreg 007-TPE.

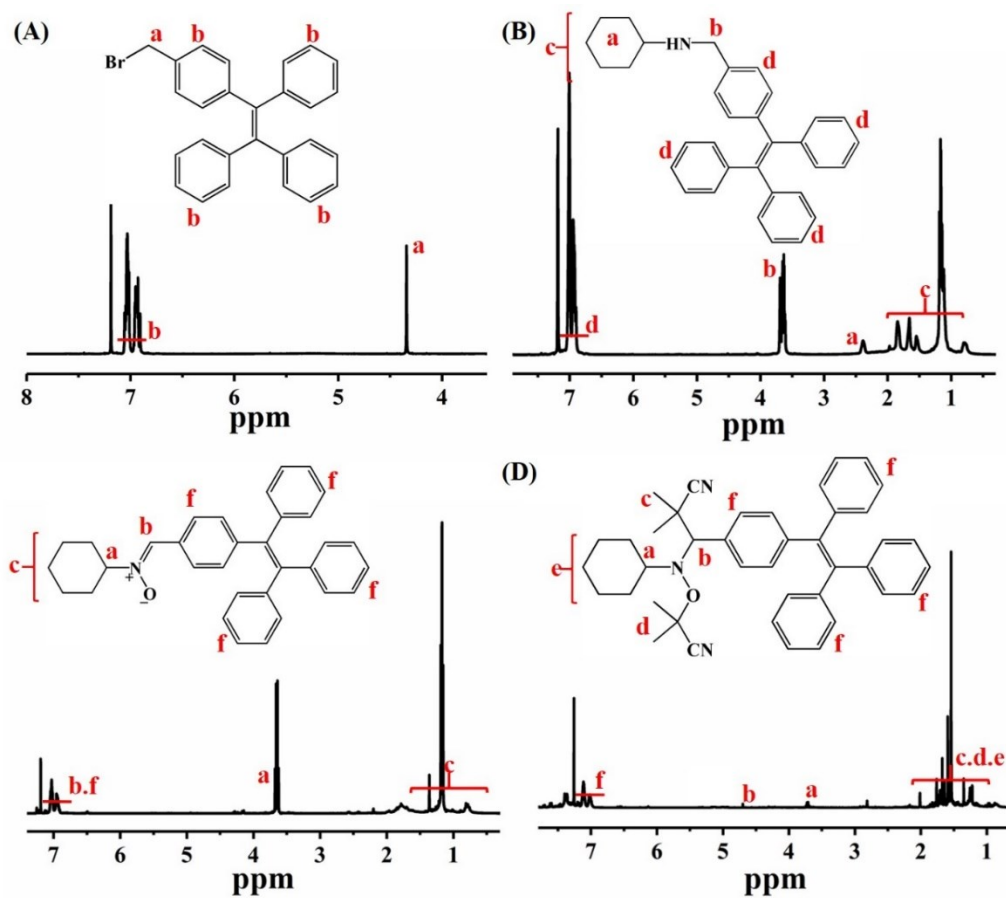

**Fig. S3.** (A)  $^1\text{H}$  NMR spectra of TPE-Br (B)  $^1\text{H}$  NMR spectra of product 1 (C)  $^1\text{H}$  NMR spectra of product 2 (D)  $^1\text{H}$  NMR spectra of Dispolreg 007-TPE.

**Table S1.** Amount of experimental feed for Entry 2-3

| Entry | Monomer | Nitroxide | [Monomer]/mL | [Nitroxide]/mg | [BPO]/mg |
|-------|---------|-----------|--------------|----------------|----------|
| 2     | St      | TEMPO-TPE | 2            | 44.78          | 10       |
| 3     | St      | TEMPO-TPE | 2            | 44.78          | 10       |

**Table S2.** Amount of experimental feed for Entry 6-7

| Entry | Monomer | Nitroxide         | [Monomer]/g | [Nitroxide]/mg | [Toluene]/g |
|-------|---------|-------------------|-------------|----------------|-------------|
| 4     | MMA     | Dispolreg 007     | 1           | 15.7           | 4           |
| 6     | MMA     | Dispolreg 007-TPE | 1           | 29.6           | 1           |
| 7     | St      | Dispolreg 007-TPE | 1           | 28.5           | 4           |

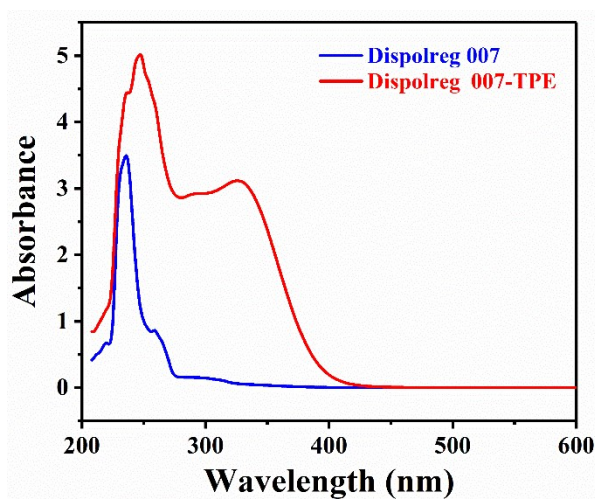

**Fig. S4.** UV-vis spectra of Dispolreg 007 and Dispolreg 007-TPE.

## Quantum chemical calculation

Software : Gaussian16

Modeling software : GaussView

Calculation method: At the required red bond, molecular (f) is broken into two parts (fa and fb), and the Gaussian software is used to calculate the energy of two parts and molecular, respectively.

Density functional method: b3lyp

Basic set : 6-31+g(d)

Correction factor: scale=0.9829

Bonding energy calculation formula :  $\Delta E=(E_{fa}+E_{fb})-E_f$

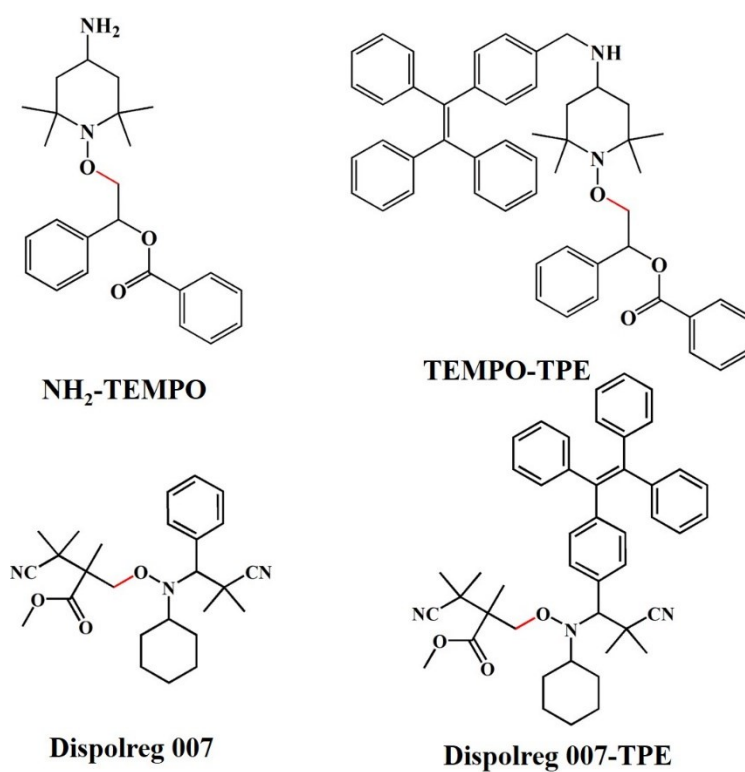

**Fig. S5.** Molecular formulas and models of NH<sub>2</sub>-TEMPO-St, TEMPO-TPE-St, Dispolreg 007-MMA and Dispolreg 007-TPE-MMA used in the quantum chemical simulations.

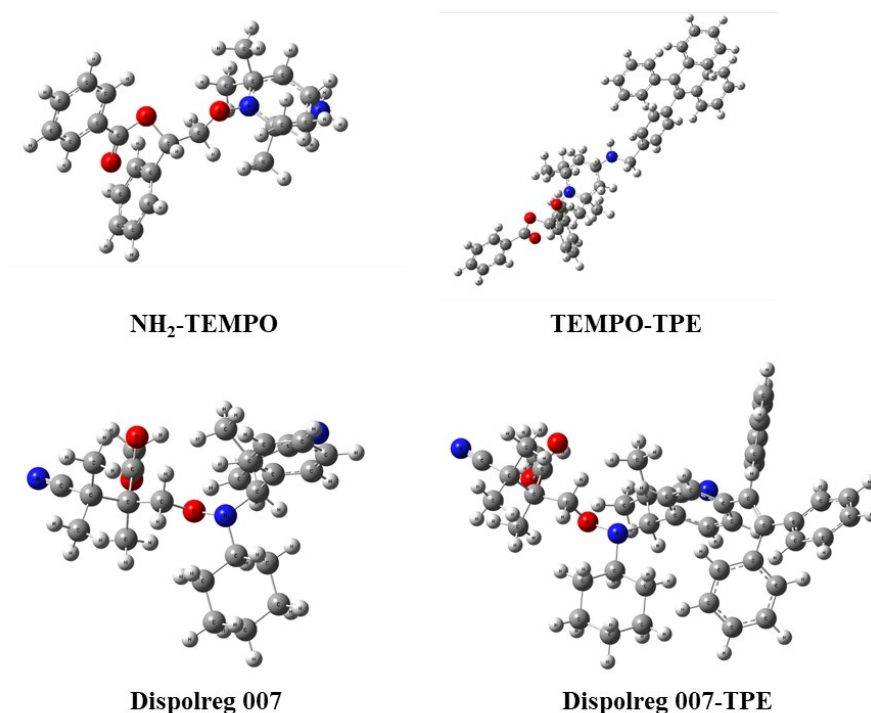

**Fig. S6.** Molecular models used in the quantum chemical simulations shown during the transition states of the intermolecular disproportionation reaction.

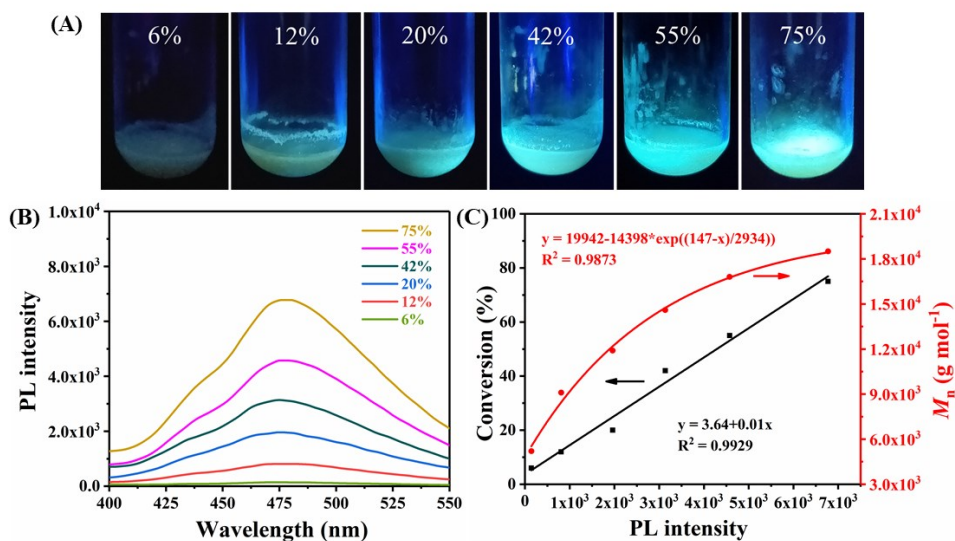

**Fig. S7.** Visualization of TEMPO-TPE mediated polymerization of PMS under 130 °C. (A)

Fluorescent photos of the polymer solutions at different conversion taken under 365 nm UV

irradiation from a hand-held UV lamp. (B) PL spectra of the polymerization mixtures at different conversion. (C) The relationship of conversion and  $M_n$  with PL intensity.

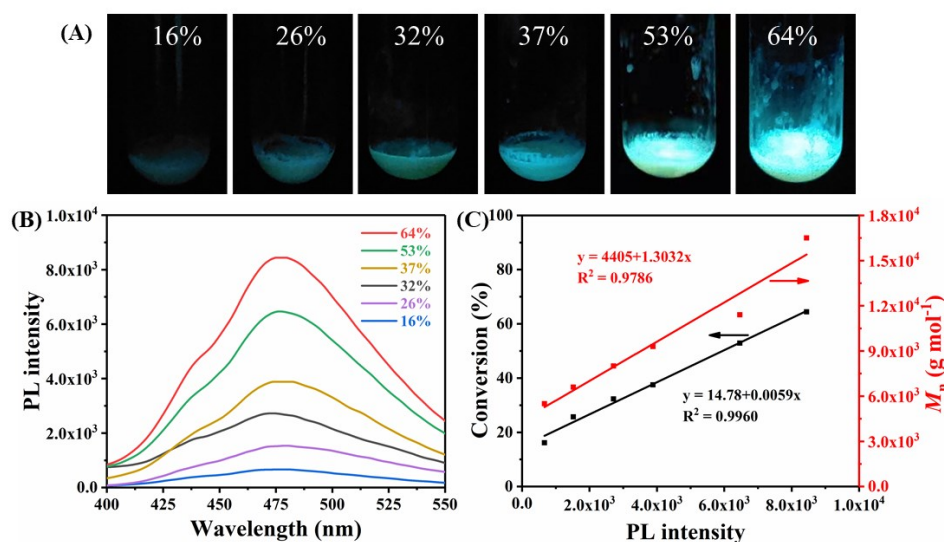

**Fig. S8.** Visualization of TEMPO-TPE mediated polymerization of St under 120 °C. (A) Fluorescent photos of the polymer solutions at different conversion taken under 365 nm UV irradiation from a hand-held UV lamp. (B) PL spectra of the polymerization mixtures at different conversion. (C) The relationship of conversion and  $M_n$  with PL intensity.

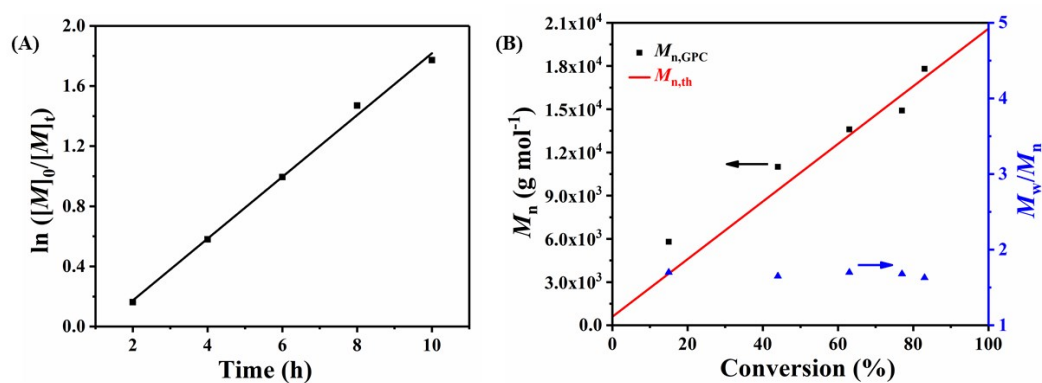

**Fig. S9.** NMP of MMA mediated by Dispolreg 007-TPE under 96 °C. (The ratio of monomer to solvent is 1:1.) (A) Kinetic plot of  $\ln([M]_0/[M]_t)$  versus time (B) Evolution of  $M_n$  and dispersity ( $M_w/M_n$ ) with conversion.



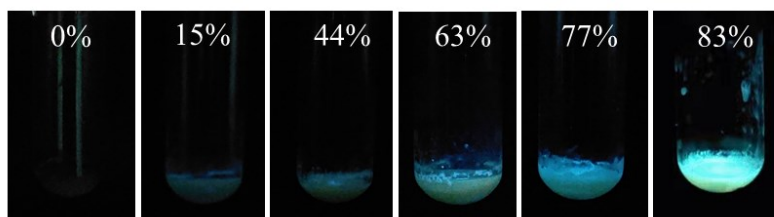

**Fig. S10.** Visualization of Dispolreg 007-TPE mediated polymerization of MMA. Fluorescent photos of the polymerization system at different conversion taken under 365 nm UV irradiation from a hand-held UV lamp.

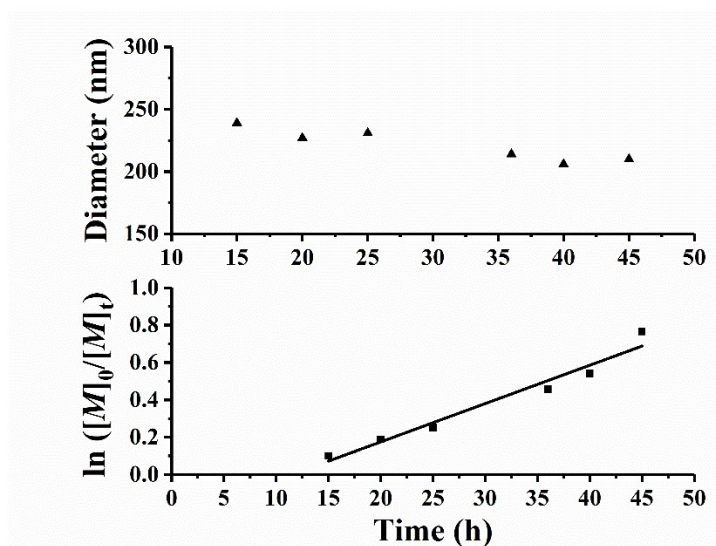

**Fig. S11.** The evolution of particle size in miniemulsion polymerization of BMA (A) and  $\ln([M]_0/[M]_t)$  vs time (B).

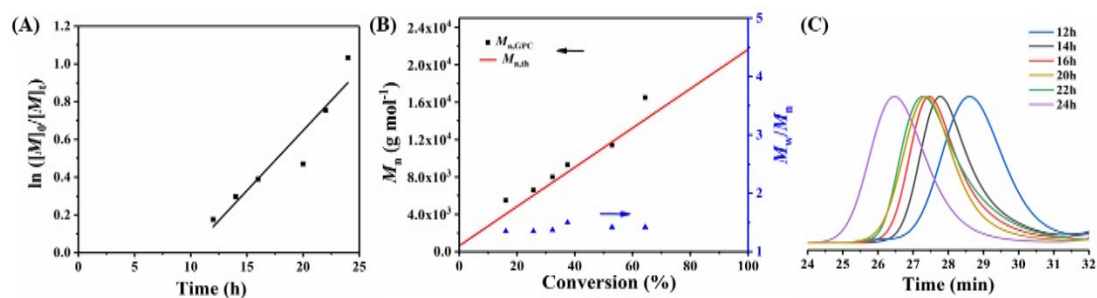

**Fig. S12.** NMP of St mediated by TEMPO-TPE under 120 °C. (A) Kinetic plot of  $\ln([M]_0/[M]_t)$  versus time (B) Evolution of  $M_n$  and dispersity ( $M_w/M_n$ ) with conversion (C) Size exclusion chromatograms of PS with time.
